# Supplementary material
Source: Springer Nature journal article supplement (https://www.springermedizin.de/resource/supplementary/12899_2009_148_MOESM3_ESM.pdf/9514560)

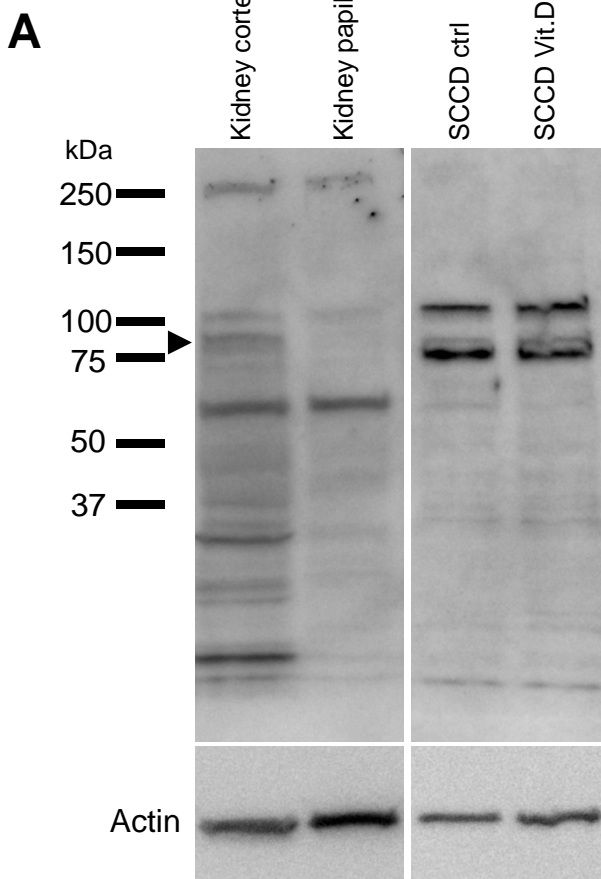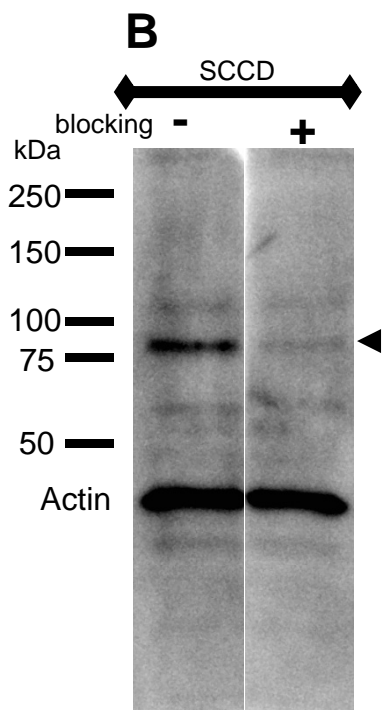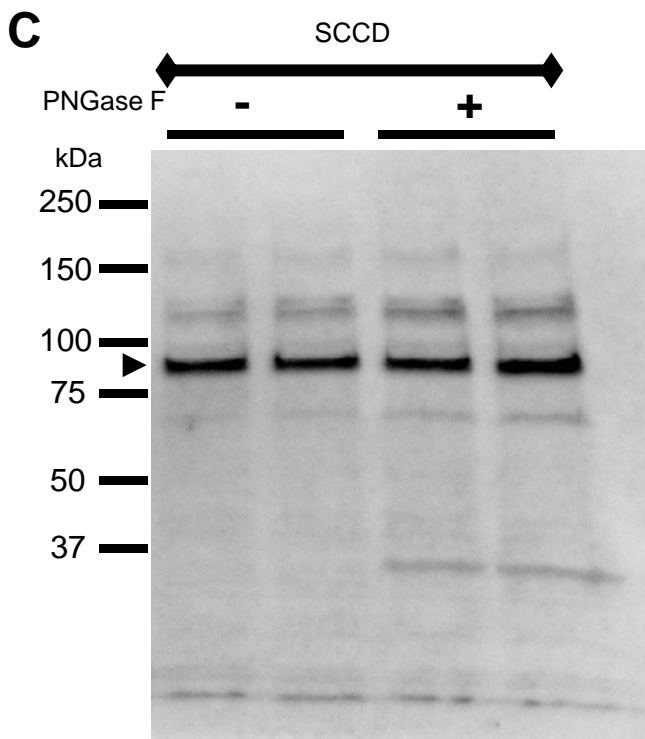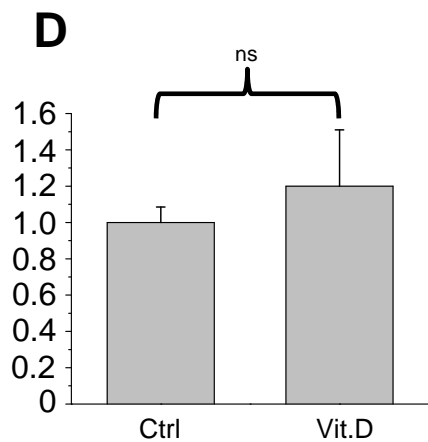

Supplement: MOESM3 [file 9514560]
